# Supplementary material for: Polymethyl methacrylate (PMMA)–bismuth ferrite (BFO) nanocomposite: low loss and high dielectric constant materials with perceptible magnetic properties
Source: Royal Society of Chemistry journal article supplement (doi:10.1039/c4dt00947a), 2014-01-01
Supplement: c4dt00947a1.pdf [file c4dt00947a1.pdf]

### Supporting Information

The Figure S1 shows the DSC curves of pure PMMA and PMMA-BFO nanocomposites. The glass transition temperature of PMMA and nanocomposites are not very clear. However, the endothermic decomposition curves clearly shows thermal stability. In case of pure PMMA decomposition temperature is  $\sim 338$  and in case of nanocomposites it is  $375-383^{\circ}\text{C}$ . This indicates that thermal stability of nanocomposites is increase with respect to PMMA.

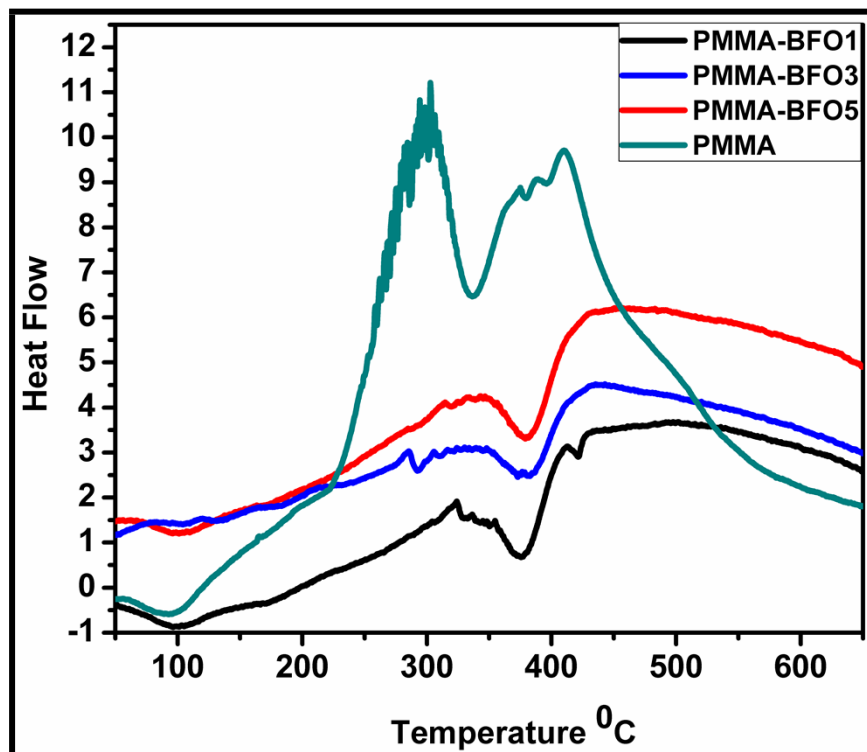

**Fig.S1** DSC of Pristine PMMA, PMMA-BFO1, PMMA-BFO3 and PMMA-BFO5 nanocomposites
